1           **Predictors of unfavourable treatment outcome in patients diagnosed with drug-resistant**  
2           **tuberculosis in the Torres Strait / Papua New Guinea border region**

3 J'Belle Foster,<sup>1,2,3,#a</sup>, Diana Mendez,<sup>3</sup>, Ben J. Marais<sup>4</sup>, Dunstan Peniyamina<sup>5</sup>, Emma S. McBryde<sup>1,2,3,#a</sup>

4

5 <sup>1</sup>James Cook University College of Medicine and Dentistry, Townsville, Queensland, Australia

6 <sup>2</sup>Torres and Cape Tuberculosis Control Unit, Thursday Island, Queensland, Australia

7 <sup>3</sup>Australian Institute of Tropical Health and Medicine, Townsville, Queensland, Australia

8 <sup>4</sup>Sydney Institute for Infectious Diseases and Biosecurity, Westmead, New South Wales, Australia

9 <sup>5</sup>Cairns Tropical Public Health Service, Cairns, Queensland, Australia

10 #aCurrent address: James Cook University College of Medicine and Dentistry, Townsville,  
11 Queensland, Australia

12

13 **ABSTRACT**

14 Drug-resistant tuberculosis (DR-TB) is an ongoing challenge in the Torres Strait Islands (TSI) / Papua  
15 New Guinea (PNG) border region. Treatment success rates have historically been poor for patients  
16 diagnosed with DR-TB, leading to increased transmission. This study aimed to identify variables  
17 associated with unfavourable outcome in patients diagnosed with DR-TB to inform programmatic  
18 improvements.

19 A retrospective study of all DR-TB cases who presented to Australian health facilities in the Torres  
20 Strait between 1 March 2000 and 31 March 2020 was performed. This time period covers four  
21 distinct TB programmatic approaches which reflect Australian and Queensland Government  
22 decisions on TB management in this remote region. Univariate and multivariate predictors of  
23 unfavourable outcome were analysed. Unfavourable outcome was defined as lost to follow up,  
24 treatment failure and death. Successful outcome was defined as cure and treatment completion.

25 In total, 133 patients with resistance to at least one TB drug were identified. The vast majority  
26 (123/133; 92%) of DR-TB patients had pulmonary involvement; and of these, 41% (50/123) had both  
27 pulmonary and extrapulmonary TB. Unfavourable outcomes were observed in 29% (39/133) of  
28 patients. Patients living with human immunodeficiency virus, renal disease or diabetes (4/133;  
29 4/133; 3/133) had an increased frequency of unfavourable outcome ( $p < 0.05$ ), but the numbers  
30 were small. Among all 133 DR-TB patients, 41% had a low lymphocyte count, which was significantly  
31 associated with unfavourable outcome ( $p < 0.05$ ). We noted a 50% increase in successful outcomes  
32 achieved in the 2016 - 2020 programmatic period, compared to earlier periods (OR 5.3, 95%  
33 Confidence Interval [1.3, 20.4]). Being a close contact of a known TB case was associated with  
34 improved outcome.

35 While DR-TB treatment outcomes have improved over time, enhanced surveillance for DR-TB, better  
36 cross border collaboration and consistent diagnosis and management of comorbidities and other risk  
37 factors should further improve patient care and outcomes.

38

39

40 **NOTE: This preprint reports new research that has not been certified by peer review and should not be used to guide clinical practice.**

41 **Introduction:**

42 Drug resistance poses a major threat to global tuberculosis (TB) control, with nearly half a million of  
43 the ten million cases in 2019 estimated to be rifampicin resistant (1). Drug-resistant (DR)-TB refers to  
44 TB strains that are resistant to any of the first-line drugs used to treat fully-susceptible TB, any of the  
45 second-line drugs used to treat DR-TB, or are resistant to a combination of these drugs (2).

46 Inadequate adherence to TB treatment may lead to the development of DR-TB and multidrug-  
47 resistant (MDR)-TB; resistant to both isoniazid and rifampicin and substantially more difficult and  
48 costly to treat (3). Treatment outcomes are generally worse for DR-TB cases due to the use of less  
49 potent drugs, prolonged treatment regimens, difficult adherence and potential severe drug-related  
50 adverse effects (4). Globally, the average treatment success rate in patients with MDR-TB in 2018  
51 was 59% (5), although this is highly variable across countries (Ukraine – 18.1% (6); China – 52.2% (7);  
52 Ethiopia – 78.6%) (8).

53 TB control poses an ongoing public health challenge in the Torres Strait / Papua New Guinea (PNG)  
54 region. The challenge is compounded by high levels of DR-TB in the Western Province of PNG and in  
55 particular, on Daru Island (9, 10) (Fig 1). In 2016, the estimated incidence rate of TB in PNG was 432 /  
56 100,000 population (WHO, 11); 674 / 100,000 in the Western Province (12). By comparison, the  
57 incidence rate of TB over the border in Queensland, Australia is 5.5 / 100,000 population (13). In the  
58 Torres Strait Islands, 80% of people identify as Torres Strait Islander Indigenous peoples (14).  
59 Indigenous Australians are disproportionately affected by TB when compared to non-Indigenous  
60 Australians (15). It is important to appreciate that residents from specific islands in the Torres Strait  
61 and villages in the Western Province of PNG share an open international border (Fig 1), heightening  
62 cross-border TB transmission risk (10).

63

64

65 **Fig 1. Map of the Torres Strait / Papua New Guinea cross-border region (16)<sup>1</sup> CC BY 4.0**

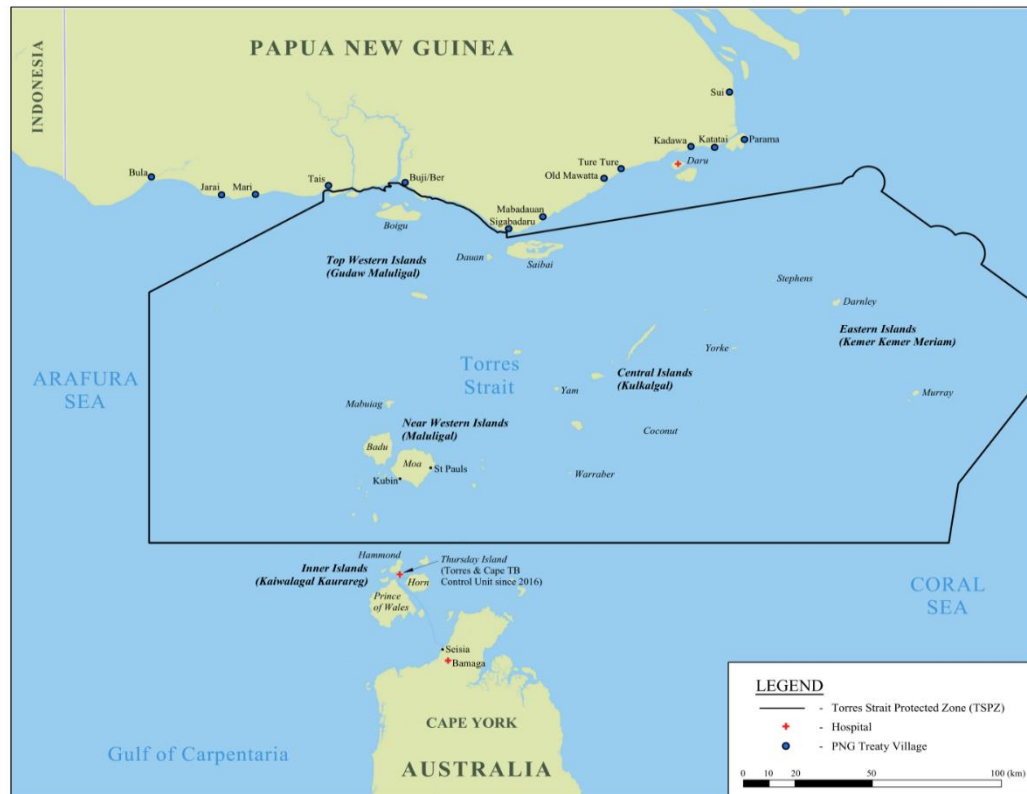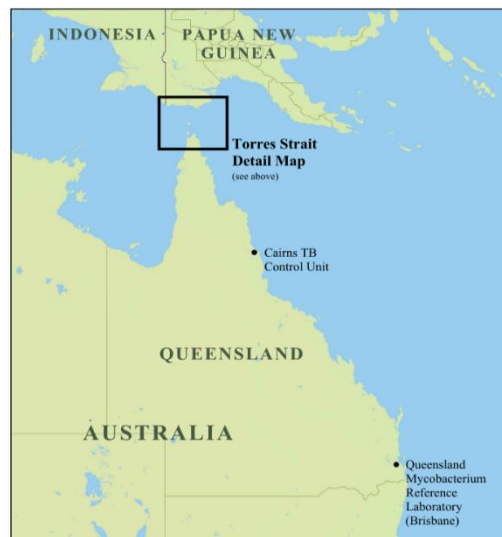

66

67 <sup>1</sup>International travel without passport or visa is permitted for traditional inhabitants of the Torres

68 Strait Protected Zone and Treaty villages of Papua New Guinea, DOI. 10.6084/m9.figshare.16632823

69 Management of DR-TB is complex and is often further complicated by comorbidities with other  
70 communicable and non-communicable diseases (17). Patients with TB and comorbidities such as  
71 renal impairment, diabetes and human immunodeficiency virus (HIV) are more likely to have  
72 unfavourable outcomes and are known causes of TB reactivation (18-20). While the rise in DR-TB is a  
73 global concern, TB programs must consider specific local risk factors and programmatic gaps to  
74 ensure better outcomes for patients. These considerations may present important opportunities for  
75 TB programmes to meet the challenging END TB targets, aiming to reduce the incidence of TB by  
76 90% before 2035 (21).

77 The aim of this study was to evaluate variables associated with unfavourable outcome and the  
78 impact of programmatic changes to models of TB care over time with treatment outcomes in DR-TB  
79 patients diagnosed in the Torres Strait / PNG border region. It is the intention that evidence derived  
80 from this study will be carefully considered at a programmatic level to further improve outcomes for  
81 patients diagnosed with DR-TB in this context.

## 82 **Methods:**

### 83 **Study Design and Population**

84 We performed a retrospective cohort study of all patients diagnosed with laboratory-confirmed DR-  
85 TB between 2000 and 2020 in the Torres Strait Islands, Australia. Pulmonary, extrapulmonary, smear  
86 positive and smear negative cases were included, as well as those with mono (isoniazid, rifampicin or  
87 streptomycin mono-resistance), poly (resistant to two or more TB drugs) and MDR-TB (resistant to  
88 isoniazid and rifampicin). Streptomycin mono-resistance was included, given the high prevalence  
89 reported in parts of PNG (22). Ethionamide resistance was analysed in relation to MDR-TB cases,  
90 given reports of frequent isoniazid and ethionamide co-resistance amongst MDR-TB strains  
91 circulating on Daru Island (23, 24).

92 Patients were excluded from the study if they were residents of PNG villages external to the Western  
93 Province of PNG who did not enter the Australian health system via a health facility in the Torres  
94 Strait Protected Zone (Fig 1).

#### 95 ***Models of TB Care – Diagnosis and Treatment***

96 There were four models of TB care provided in the region during the study period, over different  
97 periods of time (2000-2005; 2006-2012; 2013-2015; 2016-2020) (25). Supplementary material  
98 associated with the models of TB care in this region are available online from  
99 <https://doi.org/10.6084/m9.figshare.16834648.v1>. Across all four models of TB care, the primary  
100 mode of diagnosis was via sputum collection. Appropriate specimens for the diagnosis of  
101 extrapulmonary TB were rarely collected in these remote Australian border clinics. Mycobacterial  
102 culture, phenotypic drug susceptibility testing and genotyping were available throughout the study  
103 period and were performed on at least one specimen per patient in the Queensland Mycobacterium  
104 Reference Laboratory in Brisbane (Fig 1) (24). The major differences in care resulting from these  
105 changes were reduction in time to treatment commencement and retention in care (26).

106 Between 2000 and 2012, some treatment for DR-TB was available for PNG nationals diagnosed with  
107 DR-TB in Australian border clinics, however, access to treatment was improved between 2006 and  
108 2012 with the establishment of frequent outreach TB clinics in the Torres Strait. The change from the  
109 2000-2005 model of TB care to the 2006-2012 model of TB care was in direct response to Australian  
110 Government decisions to invest in TB management of PNG patients from two outer Torres Strait  
111 Islands, Boigu and Saibai (27). The 2013-2015 model of TB care is reflective of Government decisions  
112 to stand-down these outer island clinics and increase support and funding for TB health services on  
113 the PNG side of the border (28). As a result, PNG residents diagnosed from 2013 onwards were  
114 referred back to the PNG health system for treatment and management. Government decisions to  
115 invest in a local Torres Strait-based TB Control Unit with the aim to more rapidly and appropriately

116 respond to presumed TB and confirmed DR-TB cases occurred from 2016, and is ongoing (29). All  
117 Australian residents in this study were managed within the Australian public healthcare system.

### 118 ***Data Collection***

119 The Queensland Health's Notifiable Conditions System (NoCS) was used as the source for TB  
120 notification data. Only cases with laboratory confirmed DR-TB were included in the study. We used  
121 Queensland Health's laboratory software (AUSLAB) as cross-reference. One case was added to the  
122 study where their drug-resistant status was identified in AUSLAB, but not registered in NoCS.

123 Relevant biomarker data (haemoglobin, albumin, lymphocyte levels) were obtained from AUSLAB.  
124 Routinely collected biomarker data were analysed, but the fact that it was not consistently available  
125 in all patients may have introduced some selection bias.

126 The management of DR-TB at the Torres Strait / PNG border presents challenges as it involves  
127 patients from two countries accessing health systems on both sides of the border in a very remote  
128 geographical location. Given the level of interaction between inhabitants, and the increased risk of  
129 DR-TB transmission in this cross-border region (9, 10), outcomes for patients with DR-TB from both  
130 sides of the border needed to be considered to evaluate the management of DR-TB in this complex  
131 context. Hence, the main strength of this study lies in the linkage and analysis of different data  
132 sources. Data from the Queensland Department of Health sources (NoCS and AUSLAB) and the local  
133 electronic patient information system used in the Torres Strait called 'Best Practice' were linked to  
134 obtain detailed information for each patient included in this study. This data linkage resulted in a  
135 more comprehensive insight into the management of DR-TB in the region.

### 136 ***Definitions***

137 In this study, we used WHO definitions (31), where unfavourable treatment outcome was defined as  
138 death, lost to follow up or treatment failure. Successful treatment outcome was defined as  
139 completed treatment or cured. Transferred out, indicated that the patient was referred back to the

140 PNG health care system. In some patients that were transferred out, treatment outcome was  
141 unknown.

142 Comorbidities were defined as HIV infection, diabetes and renal impairment. Patients with  
143 comorbidities recorded as renal dysfunction, renal insufficiency, renal disease and renal failure were  
144 all defined as having renal impairment.

145 With reference to haemoglobin levels, anaemia was defined as those with a Z score at least 2  
146 standard deviations (SD) away from the mean, and severe anaemia was defined as those with a Z  
147 score that was at least 5SD away from the mean. This resulted in our definition of anaemia fitting  
148 with the laboratory definition of below the reference range, for a given laboratory and patient  
149 profile. Within laboratory software AUSLAB, the result is documented in an orange-coloured if it is at  
150 least 2SD away from the mean (anaemia) and in a red-colour if at least 5SD away from the mean  
151 (severe anaemia) (32). Similarly, low albumin and lymphocyte levels were defined as those with a Z  
152 score at least 2SD away from the mean.

### 153 **Data Analyses**

154 Statistical analyses were performed using IBM SPSS Statistics, version 25 (2019, Armonk, New York,  
155 United States). Frequencies and percentages were calculated for descriptive data including age  
156 categories, sex, country of birth, visa status, primary health centre (PHC) attended, programmatic  
157 diagnosis year group, site of disease, case type, comorbidities, drug resistance, cough and known  
158 close contact status. Pearson's Chi-squared tests were carried out to assess whether age group, sex,  
159 country of birth, visa status, and PHC attended were associated with unfavourable treatment  
160 outcomes.

161 Potential categorical predictors (site of disease, HIV infection status and comorbidities, case type,  
162 drug resistance and selected biomarkers including haemoglobin, lymphocytes and albumin), were  
163 analysed by unfavourable, successful or unknown treatment outcome using Fisher's exact or

164 likelihood ratios, except for ethionamide resistance and lymphocyte levels where Pearson Chi-  
165 Square was used to ascertain if there was a statistically significant association between these factors  
166 and treatment outcomes. Likelihood ratios were used to assess the association between  
167 unfavourable treatment outcome and more than one categorical variable. The categorical variable  
168 'diagnostic year group' was included in the analysis as a clinical covariate to account for  
169 programmatic changes in the clinical management of TB over time.

170 In all univariate and multivariate logistic regression analyses, multiple imputation was applied and  
171 pooled results from five imputations were used as 19 DR-TB cases did not have any biomarker  
172 results available. Biomarker Z scores were imputed for incomplete variables and were further  
173 defined as nominal (unfavourable or other) prior to imputation. To overcome differences in  
174 reference range parameters that were automatically applied by Queensland Health's laboratory  
175 software, AUSLAB to biomarker results based on sex and age, Z scores were calculated in Microsoft  
176 Excel version 2016.

177 Univariate analysis of comorbidities, diagnosis year group, contact with a known case, biomarkers,  
178 acid-fast bacilli (AFB) positivity and rifampicin-resistance were examined as potential predictors of  
179 unfavourable outcome using binary logistic regression. All predictor variables were considered for  
180 multivariate regression. The regression method was a forward algorithm with entry criteria of  $p <$   
181  $0.05$  from the univariate analyses followed by a backward algorithm with back entry criteria of  $p >$   
182  $0.05$ . The level of significance was set at  $p < 0.05$  for all analyses.

### 183 ***Ethics***

184 The Far North Queensland Human Research Ethics Committee (HREC) (HREC/17/QCH/74-1157)  
185 granted a waiver of consent and use of anonymized data, and approved the study, as did the Chair of  
186 James Cook University HREC, (H7380). Further approval was obtained to access case notification  
187 data via a Public Health Act application (QCH/36155 – 1157).



188 **Results**

189 In total, we identified 133 DR-TB patients during the study period. There were 22 deaths and one  
 190 treatment failure, 16 were lost to follow up and 51 were transferred out. Of the 51 that were  
 191 transferred out, 41 had no recorded outcome. As shown in Table 1, Boigu Island PHC received fewer  
 192 patients than Saibai Island PHC but had marginally greater treatment success (49% vs 38%). The  
 193 median age was 28 years, and patients in the 15-29 years age group were both the largest group and  
 194 disproportionately affected by unfavourable treatment outcomes. Of six adults aged  $\geq 60$  years, 83%  
 195 ( $n = 5$ ) had an unfavourable treatment outcome. Being a PNG national rather than an Australian  
 196 Torres Strait Islander was highly predictive of unfavourable treatment outcome.

197 **Table 1. Demographic characteristics and treatment outcome of all patients diagnosed with drug-**  
 198 **resistant tuberculosis in the Torres Strait Islands between 2000 and 2020**

| Demographic characteristic | Treatment Outcome<br>N = 133 (%) <sup>†</sup> |           |              |        |                   |                 | Total        | p-value |
|----------------------------|-----------------------------------------------|-----------|--------------|--------|-------------------|-----------------|--------------|---------|
|                            | Successful                                    |           | Unfavourable |        |                   | Transferred Out |              |         |
|                            | Cured                                         | Completed | Died         | Failed | Lost to follow up |                 |              |         |
| <b>Age group</b>           |                                               |           |              |        |                   |                 | <b>0.02</b>  |         |
| <5 years                   | 2 (22)                                        | 5 (56)    | 0 (0)        | 0 (0)  | 0 (0)             | 2 (22)          | 9            |         |
| 5-14 years                 | 1 (10)                                        | 3 (30)    | 1 (10)       | 0 (0)  | 2 (20)            | 3 (30)          | 10           |         |
| 15-44 years                | 9 (9)                                         | 30 (32)   | 15 (16)      | 0 (0)  | 14 (15)           | 27 (28)         | 95           |         |
| 45-59 years                | 0 (0)                                         | 2 (15)    | 2 (15)       | 0 (0)  | 0 (0)             | 9 (70)          | 13           |         |
| $\geq 60$ years            | 1 (17)                                        | 0 (0)     | 4 (67)       | 1 (17) | 0 (0)             | 0 (0)           | 6            |         |
| <b>Sex</b>                 |                                               |           |              |        |                   |                 | <b>0.7</b>   |         |
| Female                     | 9 (12)                                        | 22 (30)   | 14 (19)      | 1 (1)  | 8 (11)            | 21 (28)         | 75           |         |
| Male                       | 4 (7)                                         | 18 (31)   | 8 (14)       | 0 (0)  | 8 (14)            | 20 (35)         | 58           |         |
| <b>Country of Birth</b>    |                                               |           |              |        |                   |                 | <b>0.02</b>  |         |
| Australia                  | 3 (50)                                        | 2 (33)    | 1 (17)       | 0 (0)  | 0 (0)             | 0 (0)           | 6            |         |
| Papua New Guinea           | 10 (8)                                        | 38 (30)   | 21 (17)      | 1 (1)  | 16 (13)           | 41 (32)         | 127          |         |
| <b>Visa Status</b>         |                                               |           |              |        |                   |                 | <b>0.002</b> |         |
| Australian resident        | 3 (33)                                        | 3 (33)    | 2 (22)       | 1 (11) | 0 (0)             | 0 (0)           | 9            |         |

|                                       |         |         |         |       |         |         |     |     |
|---------------------------------------|---------|---------|---------|-------|---------|---------|-----|-----|
| Papua New Guinea Treaty Visitor       | 5 (6)   | 23 (27) | 15 (17) | 0 (0) | 13 (15) | 30 (35) | 86  |     |
| Papua New Guinea non-Treaty Visitor   | 5 (13)  | 14 (37) | 5 (13)  | 0 (0) | 3 (8)   | 11 (29) | 38  |     |
| <b>Primary Health Centre Attended</b> |         |         |         |       |         |         |     | 1.0 |
| Saibai Island                         | 11 (10) | 32 (29) | 19 (17) | 1 (1) | 14 (13) | 33 (30) | 110 |     |
| Boigu Island                          | 2 (13)  | 7 (44)  | 2 (13)  | 0 (0) | 2 (13)  | 3 (19)  | 16  |     |
| Murray Island                         | 0 (0)   | 0 (0)   | 0 (0)   | 0 (0) | 0 (0)   | 2 (100) | 2   |     |
| Darnley Island                        | 0 (0)   | 1 (50)  | 0 (0)   | 0 (0) | 0 (0)   | 1 (50)  | 2   |     |
| Yorke Island                          | 0 (0)   | 0 (0)   | 1 (50)  | 0 (0) | 0 (0)   | 1 (50)  | 2   |     |
| Thursday Island                       | 0 (0)   | 0 (0)   | 0 (0)   | 0 (0) | 0 (0)   | 1 (100) | 1   |     |

199 † Percentages may not equal 100 due to rounding.

200

201 Table 2 shows that DR-TB patients diagnosed between 2000 and 2005 were more likely to have  
 202 unfavourable treatment outcomes (50%;  $n = 7$ ) than those diagnosed between 2016 and 2020 (17%;  
 203  $n = 2$ ). Overall, outcome improved in recent years with a 50% increase in the chance of a successful  
 204 outcome between 2016 – 2020, when compared to all other programmatic year groups; OR 5.3, 95%  
 205 Confidence Interval (CI) [1.3, 20.4]. Of 133 DR-TB cases, 67% ( $n = 89$ ) had MDR-TB and of those, 74%  
 206 ( $n = 66$ ) were new cases and 32% had an unfavourable treatment outcome. Ethionamide resistance  
 207 was only identified in patients diagnosed with MDR-TB ( $p < .001$ ); 90% ( $n = 80$ ) of MDR-TB cases were  
 208 found to be ethionamide resistant. Nearly one in five patients had previously received full or partial  
 209 treatment in Australia or PNG. The composite comorbidity variable comprised of nine patients with  
 210 DR-TB and HIV infection, diabetes and/or renal impairment. Of four patients with DR-TB/HIV  
 211 coinfection, and three patients with DR-TB/diabetes comorbidity, none had a successful outcome.  
 212 Overall, 78% ( $n = 7$ ) of patients with DR-TB and at least one comorbidity had an unfavourable  
 213 treatment outcome.

214

215 **Table 2. Clinical variables of patients diagnosed with drug-resistant tuberculosis in the Torres**  
 216 **Strait between 2000 and 2020, and their association with successful, unfavourable and other TB**  
 217 **treatment outcome**

| Variable                                          | Treatment Outcome<br>N = 133 (% of total) |                             |                                  | Total | p-value      |
|---------------------------------------------------|-------------------------------------------|-----------------------------|----------------------------------|-------|--------------|
|                                                   | Unfavourable<br>(N = 39; 29%)             | Successful<br>(N = 53; 40%) | Transferred out<br>(N = 41; 31%) |       |              |
| <b>Diagnosis Year Group*^</b>                     |                                           |                             |                                  | 133   | <b>0.045</b> |
| 2000-2005                                         | 7 (50)                                    | 5 (36)                      | 2 (14)                           | 14    |              |
| 2006-2012                                         | 26 (27)                                   | 37 (39)                     | 33 (34)                          | 96    |              |
| 2013-2015                                         | 4 (36)                                    | 2 (18)                      | 5 (46)                           | 11    |              |
| 2016-2020                                         | 2 (17)                                    | 9 (75)                      | 1 (8)                            | 12    |              |
| <b>Disease Site</b>                               |                                           |                             |                                  | 133   | 0.08         |
| Pulmonary TB                                      | 25 (34)                                   | 22 (30)                     | 26 (36)                          | 73    |              |
| Extrapulmonary TB                                 | 2 (20)                                    | 7 (50)                      | 1 (10)                           | 10    |              |
| Both PTB and EPTB                                 | 12 (24)                                   | 24 (48)                     | 14 (28)                          | 50    |              |
| <b>Cavitary Disease</b>                           | 16 (42)                                   | 12 (32)                     | 10 (26)                          | 38    | 0.1          |
| <b>Case Type</b>                                  |                                           |                             |                                  | 133   | 0.2          |
| New                                               | 29 (27)                                   | 41 (38)                     | 37 (35)                          | 107   |              |
| Full or partial treatment overseas                | 8 (38)                                    | 11 (52)                     | 2 (10)                           | 21    |              |
| Full or partial treatment in Australia            | 2 (40)                                    | 1 (20)                      | 2 (40)                           | 5     |              |
| <b>Comorbidities</b>                              |                                           |                             |                                  | 133   | <b>0.003</b> |
| Diabetes Mellitus, Renal Disease or HIV infection | 7 (78)                                    | 0                           | 2 (22)                           | 9     |              |
| No known risk factors                             | 32 (26)                                   | 53 (43)                     | 39 (32)                          | 124   |              |
| <b>Drug Resistance</b>                            |                                           |                             |                                  | 133   | <b>0.04</b>  |
| Isoniazid (mono)                                  | 5 (14)                                    | 16 (46)                     | 14 (40)                          | 35    |              |
| Rifampicin (mono)                                 | 3 (75)                                    | 1 (25)                      | 0                                | 4     |              |
| MDR-TB                                            | 29 (33)                                   | 33 (37)                     | 27 (30)                          | 89    |              |
| Other (streptomycin mono)                         | 2 (40)                                    | 3 (60)                      | 0                                | 5     |              |
| <b>Ethionamide</b>                                |                                           |                             |                                  | 133   | 0.8          |
| Ethionamide resistant                             | 24 (30)                                   | 30 (38)                     | 26 (33)                          | 80    |              |
| Susceptible                                       | 15 (28)                                   | 23 (43)                     | 15 (28)                          | 53    |              |
| <b>Cough</b>                                      |                                           |                             |                                  | 114   | 0.1          |
| Cough                                             | 27 (31)                                   | 31 (36)                     | 29 (33)                          | 87    |              |
| No cough                                          | 4 (15)                                    | 15 (56)                     | 8 (30)                           | 27    |              |
| <b>Close Contact<sup>#</sup></b>                  |                                           |                             |                                  | 133   | <b>0.02</b>  |
| Close contact                                     | 8 (16)                                    | 23 (45)                     | 20 (39)                          | 51    |              |
| No known contact                                  | 31 (38)                                   | 30 (37)                     | 21 (26)                          | 82    |              |

218 Note. Unfavourable treatment outcome - died, failed, lost to follow up; successful outcome - cured,  
219 completed treatment; other - transferred out

220 \*Diagnosis year group was included as a variable due to changes in the clinical management of DR-  
221 TB patients over time.

222 ^OR 5.3, 95% CI [1.3, 20.4], where diagnostic year group 2016-2020 versus all other year groups was  
223 analysed as a categorical variable by successful treatment outcome versus unfavourable treatment  
224 outcome or transferred out

225 #Close contact to a known TB case as reported by patient.

226 PTB, pulmonary TB; EPTB, extrapulmonary TB; MDR-TB, multidrug-resistant TB.

227

228 Table 3 shows that 86% ( $n = 92$ ) of patients with haemoglobin recorded had anaemia, and of those,

229 38% ( $n = 35$ ) had severe anaemia. Low albumin was detected in 76% ( $n = 80$ ) of patients, where this

230 was measured. A large percentage of patients with low lymphocyte levels, (44%;  $n = 43$ ) had an

231 unfavourable treatment outcome.

232 **Table 3. Blood test abnormalities in patients diagnosed with drug-resistant tuberculosis in the**  
233 **Torres Strait between 2000 and 2020, and their association with treatment outcome**

| Variable                              | Treatment Outcome n (%) |         |       |             |
|---------------------------------------|-------------------------|---------|-------|-------------|
|                                       | Unfavourable            | Other   | Total | p-value     |
| <b>Haemoglobin Levels* (50-146L)</b>  |                         |         | 107   | 0.5         |
| No anaemia                            | 3 (20)                  | 12 (80) | 15    |             |
| Mild anaemia                          | 20 (35)                 | 37 (65) | 57    |             |
| Severe anaemia                        | 10 (29)                 | 25 (71) | 35    |             |
| <b>Lymphocyte count# (0.04-9.80L)</b> |                         |         | 106   | <b>0.01</b> |
| Normal                                | 13 (21)                 | 50 (79) | 63    |             |
| Low                                   | 19 (44)                 | 24 (56) | 43    |             |
| <b>Albumin# (&lt;15-48L)</b>          |                         |         | 105   | 0.07        |
| Other (normal or high)                | 4 (16)                  | 21 (84) | 25    |             |
| Low                                   | 28 (35)                 | 52 (65) | 80    |             |

234 \*Mild anaemia, at least 2 standard deviations (SD) away from the mean; severe anaemia, at least

235 5SD away from the mean; #Low lymphocyte and albumin, at least 2SD away from the mean.

236 In Table 4, patients with comorbidities, low lymphocyte levels and AFB positivity were significantly

237 more likely to have unfavourable treatment outcomes. Being a close contact of a known TB case was

238 a protective factor and reduced the odds of an unfavourable treatment outcome occurring ( $p$  .008;  
239 OR .31). Although the  $p$  value for anaemia in Table 3 was  $> .1$ , this variable was included in the  
240 univariate analysis as other studies have demonstrated an association between anaemia and  
241 unfavourable treatment outcomes (33), however in this study, anaemia was not a significant  
242 predictor of unfavourable treatment outcomes. In the adjusted multivariate model, comorbidities,  
243 being a close contact of a known TB case and low lymphocyte levels retained significance ( $p < 0.05$ ).

244 **Table 4. Variables associated with unfavourable treatment outcome among drug-resistant**  
245 **tuberculosis cases diagnosed in the Torres Strait / Papua New Guinea border region between 2000**  
246 **and 2020 (N = 133)**

| Variable                                 |         | Unfavourable outcome | Univariate Analysis |              | Multivariate Analysis      |              |
|------------------------------------------|---------|----------------------|---------------------|--------------|----------------------------|--------------|
|                                          | n (%)   | n (%)                | OR (95% CI)         | p-value      | aOR (95% CI)               | p-value      |
| Comorbidities (DM, renal, HIV infection) | 9 (7)   | 7 (78)               | 10.06 (1.98-50.96)  | <b>0.005</b> | 17.4 (2.6-117.06)          | <b>0.003</b> |
| Contact with known TB case               | 51 (38) | 8 (16)               | .3 (.12-.73)        | <b>0.008</b> | .3 (.08-.87)               | <b>0.03</b>  |
| Low lymphocyte level                     | 43 (32) | 19 (44)              | 3.05 (1.29-7.17)    | <b>0.01</b>  | 2.7 (1.1-7.08)             | <b>0.04</b>  |
| AFB positive                             | 80 (60) | 29 (36)              | 2.4 (1.07-5.58)     | <b>0.03</b>  | 1.6 (.56-4.48)             | 0.4          |
| Rifampicin resistance                    | 93 (70) | 32 (34)              | 2.5 (.96-6.21)      | 0.05         | Eliminated at forward step |              |
| Anaemia                                  | 93 (70) | 30 (32)              | 1.9 (.50-7.26)      | 0.3          | Eliminated at forward step |              |
| Low albumin level                        | 80 (60) | 28 (35)              | 2.8 (.88-9.05)      | 0.08         | Eliminated at forward step |              |
| Female sex                               | 75 (56) | 23 (31)              | 1.2 (.55-2.47)      | 0.7          | Eliminated at forward step |              |

247 Note. aOR, adjusted odds ratio; CI, confidence interval; DM, diabetes mellitus; renal, renal  
248 impairment; HIV, human immunodeficiency virus; AFB, acid-fast bacilli.

249

## 250 Discussion

251 Few reports focus on the specific challenges and unique health care access issues experienced by  
252 DR-TB patients in remote settings like the Torres Strait / PNG border region. This study identified  
253 variables associated with unfavourable treatment outcomes in patients diagnosed with DR-TB and

254 examined the impact of four different models of TB care over two decades. We documented a  
255 significant improvement in successful treatment outcomes once a local decentralised TB control unit  
256 was established in 2016. Patients diagnosed before 2013 had the worst treatment outcomes, which  
257 is reflective of a time when accessibility to mycobacterial culture and drug susceptibility testing was  
258 not routinely available on Daru Island in PNG, and where access to second-line TB drugs was only  
259 available for Western Province PNG nationals via Australian TB clinics (34). For patients diagnosed  
260 between 2013 and 2015 in this study, a higher proportion had an unknown outcome. This is  
261 consistent with the changeover from the 2006 to 2012 TB management model of increased  
262 surveillance and detection at border clinics, to a handover period whereby PNG patients diagnosed  
263 at Australian border health facilities were referred back to the PNG health system for ongoing  
264 management and care.

265 From 2016 onwards, TB clinicians were based in the Torres Strait and therefore able to rapidly  
266 respond to cases diagnosed, associated contact tracing efforts and monitoring of treatment  
267 compliance and outcomes for patients. Higher success rates for DR-TB patients have been reported  
268 in countries where patients have access to developed health infrastructure and where skilled  
269 clinicians are positioned to support DR-TB patients (35). From 2016, local nurses and Indigenous  
270 Health Workers undertook Directly Observed Therapy for TB patients residing in the Torres Strait.  
271 Collegial relationships between TB programs in the Torres Strait and Daru Island were also  
272 strengthened through this period with the joint development of procedural documents and  
273 processes (36) which enabled each TB program to define data requirements, streamline the  
274 exchange of shared patient information, and enhance surveillance capability. These strengthened  
275 relationships may help to explain the reduction in unknown treatment outcomes in this study from  
276 2016. These initiatives are consistent with the Australian National Tuberculosis Advisory Committee  
277 (NTAC) recommendations to engage in regional and bilateral collaborations in order to improve TB  
278 services in cross-border areas (37).

279 It is widely accepted that household contacts of DR-TB patients are at greater risk of exposure,  
280 infection and disease progression when compared with other types of contacts (38). In a study of  
281 MDR-TB index cases in Pakistan, MDR-TB diagnoses were reported in 17.4% of close contacts (38).  
282 Unlike isoniazid-resistant TB which is more amenable to treatment, patients with MDR-TB may be  
283 more likely to remain infectious longer than patients with drug susceptible TB (39), thus increasing  
284 the likelihood of transmission to close contacts. Despite the increased transmission risk, close  
285 contacts had more favourable outcomes in this study. A possible explanation is that these close  
286 contact patients were actively screened, or linked in with healthcare services earlier because of  
287 raised awareness, leading to earlier diagnosis and potentially improved treatment adherence. Better  
288 outcomes for close contacts after 2014 may also be attributed to improved health literacy and  
289 symptom recognition as a result of mass community education offered in the region from 2014 (40).

290 This retrospective study has a number of limitations. Details of the drug regimens used for individual  
291 patients in this study were not available for analysis, however twice and thrice weekly dosing of  
292 second-line drugs was available for some MDR-TB patients treated between 2006 and 2015. From  
293 2016, clofazimine and linezolid were included in most MDR-TB regimens in the region per WHO  
294 recommendations (41), and bedaquiline was first used in the region in 2018. The study did not  
295 identify the type of close contact (i.e. household contact), nor ascertain the type of TB that each  
296 close contact was exposed to. The recent upgrade of the Mabadauan health centre in PNG will aid  
297 the PNG health system's capacity to manage close contacts in border communities. It will, however,  
298 be important that expanded diagnostic capabilities at Mabadauan, are matched with capacity to  
299 retain patients in the TB care pathway (35). Since 2016, the Torres and Cape TB Control Unit has  
300 collected and shared TB contact tracing data with Daru General Hospital, related to all PNG residents  
301 diagnosed with TB in the Torres Strait. It is anticipated that increased capacity of local health  
302 services available to residents of PNG living adjacent to the Torres Strait, may lead to effective TB  
303 contact management, further improve treatment outcomes for PNG patients diagnosed with DR-TB  
304 as well as support TB patients with other comorbidities.

305 Patients with pre-existing comorbidities in this study were significantly more likely to have  
306 unfavourable treatment outcomes, which is consistent with earlier findings (6, 42, 43). In our study,  
307 no patients with a serious comorbidity were cured or completed treatment. HIV is a major risk factor  
308 for TB disease development and associated with unfavourable treatment outcome in the absence of  
309 successful HIV care, which is a major concern in the study setting. However, HIV is unlikely to be a  
310 major contributing factor in community TB transmission dynamics as currently less than 1% of the  
311 population is HIV infected (44). It is possible that ‘stand-alone’ vertical disease programs for TB  
312 control, diabetes management and sexual health, may contribute to poor linkage of care and  
313 unfavourable treatment outcomes for DR-TB patients with a comorbidity (45). It would be beneficial  
314 for TB programs to establish strong linkages with both diabetes educators and sexual health  
315 providers to provide enhanced screening, monitoring and management support for patients with  
316 these comorbidities (46). As there were no protocols in place to consistently screen TB patients for  
317 diabetes or renal impairment during this study period, it is possible that comorbidities have been  
318 under-reported in this study.

319 In renal patients, delayed TB diagnosis is a possible reason for unfavourable outcome (47).  
320 Aboriginal and Torres Strait Islander peoples develop chronic kidney disease three times as often as  
321 non-Indigenous Australians (48) and in Torres Strait Islander adults, a recent survey found that  
322 nearly one in five people showed signs and symptoms of chronic kidney disease (49). Renal  
323 impairment is more likely to be documented in residents of the Torres Strait Islands due to their  
324 relative ease of access to ongoing health services in the region. By contrast, an absence of renal  
325 dialysis in the Treaty villages suggests there would be limited survival of PNG patients with kidney  
326 disease. As uremic symptoms like fever and weight loss are non-specific symptoms of both TB and  
327 renal disease, renal physicians would be well placed to consider TB as a differential diagnosis and  
328 monitor patients with insidious onset of these symptoms (47). Early detection of TB in renal patients  
329 may be key to improved outcomes (47). Efforts to increase collaboration between renal and TB units  
330 in the Torres Strait may help reduce diagnostic delay and better support shared patients. Many



331 studies have reported high rates of mortality in TB patients with comorbidities (47, 50-52) and in  
332 patients with low levels of haemoglobin, albumin and lymphocytes (53).

333 Although not consistently measured, low lymphocyte levels were statistically significantly associated  
334 with unfavourable treatment outcomes in DR-TB patients, and also among HIV uninfected patients,  
335 which is consistent with findings in other studies (54). In patients who were previously lost to follow  
336 up or with past treatment failure, overall health decline evidenced by low lymphocyte levels can be a  
337 marker for disease severity and complexity (55). When compared to drug susceptible TB, lower  
338 lymphocyte counts have been reported in MDR-TB patients (56). Low lymphocyte counts, as well as  
339 haemoglobin and albumin levels, are all indicative of general poor health at the time of treatment  
340 initiation.

341 Low haemoglobin and albumin levels have been identified as strong predictors of TB mortality (57)  
342 and in China and Israel, an association between hypoalbuminaemia and poor prognosis in DR-TB  
343 patients has been reported (7, 58). A study conducted in Ethiopia reported that MDR-TB patients  
344 with low haemoglobin levels (anaemia) were more than twice as likely to have unfavourable  
345 treatment outcomes when compared to patients without anaemia (42). Low haemoglobin has also  
346 been associated with unfavourable treatment outcomes in non-MDR TB patients, specifically with  
347 delayed sputum conversion at two months (59). It is possible that the anaemia observed in DR-TB  
348 patients is due to nutritional iron deficiency and not chronic disease (33), however this study did not  
349 explore levels of iron, ferritin, hepcidin and transferrin in TB patients or assess haemoglobin levels in  
350 the general population.

351 Several limitations have already been described above. Another limitation of this study is that only  
352 people with laboratory-confirmed DR-TB isolates were included, excluding those with drug  
353 susceptible TB or unconfirmed DR-TB. This therefore represents a very select group and limits our  
354 ability to comment on general trends and outcomes. We were however able to compare those with

355 and without rifampicin resistance, finding a trend to worse outcome in those with rifampicin  
356 resistance.

357 Apart from selection bias, the relatively small number of patients also affected the power of our  
358 statistical analyses. Future studies could incorporate drug-susceptible patients as well, which would  
359 provide a more generalizable comparator. We were unable to ascertain whether the cause of death  
360 for all patients was TB, however, patient death was documented during the time period for the  
361 course of TB treatment for all patients. As this was an observational study of care delivered over  
362 time, we acknowledge that there may be confounding factors, linked to changes in clinical care and  
363 the availability of new diagnostic tools and treatment options.

#### 364 **Conclusion**

365 Although having a locally-based TB program in the Torres Strait has resulted in better treatment  
366 outcomes for DR-TB patients, more interventions to improve treatment outcomes and refine the  
367 focus on vulnerable sub-populations are needed. Most patients with comorbidities in this study had  
368 an unfavourable treatment outcome and poor health indicators suggesting late presentation or  
369 underlying poor management of their comorbidity. These findings have important implications for  
370 TB programs on both sides of this international border. Key strategies should include strong cross-  
371 border working relationships, as well as better collaboration with diabetes, renal and sexual health  
372 care providers to identify and manage TB in patients. There should be an ongoing commitment to  
373 enhance HIV care and to improve the care of DR-TB patients at-risk of unfavourable treatment  
374 outcomes.

375

376

377

378

## 379 REFERENCES

- 380 1. World Health Organization. Global tuberculosis report. Geneva, Switzerland: World Health  
381 Organization; 2020.
- 382 2. World Health Organization. WHO consolidated guidelines on drug-resistant tuberculosis  
383 treatment. Geneva, Switzerland: World Health Organization; 2019.
- 384 3. Jenkins HE, Crudu V, Soltan V, Ciobanu A, Domente L, Cohen T. High risk and rapid  
385 appearance of multidrug resistance during tuberculosis treatment in Moldova. *Eur Respir J*.  
386 2014;43:1132-41.
- 387 4. Sagwa E, Ruswa N, Musasa JP, Mantel-Teeuwisse AK. Adverse events during treatment of  
388 drug-resistant tuberculosis: A comparison between patients with or without human  
389 immunodeficiency virus co-infection. *Drug Safety*. 2013;36:1087–96.
- 390 5. World Health Organization. Tuberculosis Geneva, Switzerland: World Health Organization;  
391 2021 [Available from: <https://www.who.int/news-room/fact-sheets/detail/tuberculosis#>.
- 392 6. Aibana O, Bachmaha M, Krasiuk V, Rybak N, Flanigan TP, Petrenko V, et al. Risk factors for  
393 poor multidrug-resistant tuberculosis treatment outcomes in Kyiv Oblast, Ukraine. *Biomed Central  
394 Infectious Diseases*. 2017;17(129).
- 395 7. Tang S, Tan S, Yao L, Li F, Li L, Guo X, et al. Risk Factors for Poor Treatment Outcomes in  
396 Patients with MDR-TB and XDR-TB in China: Retrospective Multi-Center Investigation. *PLoS ONE*.  
397 2013;8(12).
- 398 8. Meressa D, Hurtado RM, Andrews JR, Diro E, Abato K, Daniel T, et al. Achieving high  
399 treatment success for multidrug-resistant TB in Africa: initiation and scale-up of MDR TB care in  
400 Ethiopia—an observational cohort study. *Biomed Journal Thorax*. 2015;70(12).
- 401 9. Furin J, Cox H. Outbreak of multidrug-resistant tuberculosis on Daru Island. *Lancet Respir  
402 Med*. 2016;4(5):347-9.
- 403 10. Baird T, Donnan, E., Coulter, C., Simpson, G., Konstantinos, A., Eather, G. . Multidrug-  
404 resistant tuberculosis in Queensland, Australia: an ongoing cross-border challenge. *Int J Tuberc Lung  
405 Dis*. 2018;22(2):206-11.
- 406 11. World Health Organization. TB country profile - Papua New Guinea. Geneva, Switzerland:  
407 World Health Organization; 2016.
- 408 12. Aia P, Wangchuk L, Morishita F, Kisomb J, Yasi R, Kal M, et al. Epidemiology of tuberculosis in  
409 Papua New Guinea: analysis of case notification and treatment-outcome data, 2008-2016. *Western  
410 Pacific Surveillance and Response Journal*. 2018;9(2):9-19.
- 411 13. Viney K. The Australian tuberculosis risk factor survey Canberra, ACT: Australian National  
412 University; 2021.
- 413 14. Australian Bureau of Statistics. Changing characteristics of the Torres Strait region and its  
414 people. Canberra, ACT: Australian Bureau of Statistics; 2018.
- 415 15. Robertus LM, Konstantinos A, Hayman NE, Paterson DL. Tuberculosis in the Australian  
416 indigenous population: History, current situation and future challenges. *Australian and New Zealand  
417 Journal of Public Health*. 2011;35(1):6-9.
- 418 16. Moran M, Foster J, Mendez D, cartographers. Map of the Torres Strait / Papua New Guinea  
419 cross-border region. Cairns, Queensland; 2021.
- 420 17. Esmail A, Sabur NF, Okpechi I, Dheda K. Table Bloods. Management of drug-resistant  
421 tuberculosis in special sub-populations including those with HIV co-infection, pregnancy, diabetes,  
422 organ-specific dysfunction, and in the critically ill. *Journal of Thoracic Disease*. 2018;10(5).
- 423 18. Chung-Delgado K, Guillen-Bravo S, Revilla-Montag A, Bernabe-Ortiz A. Mortality among  
424 MDR-TB Cases: Comparison with Drug-Susceptible Tuberculosis and Associated Factors. *PLoS ONE*.  
425 2015;10(3).
- 426 19. Bhering M, Duarte R, Kritski A. Predictive factors for unfavourable treatment . in MDR-TB and  
427 XDR-TB patients in Rio de Janeiro State, Brazil, 2000-2016. *PLoS ONE*. 2019;14(11).
- 428 20. Gómez-Gómez A, Magaña-Aquino M, López-Meza S, Aranda-Álvarez M, Díaz-Ornelas DE,  
429 Guadalupe Hernández-Segura M, et al. Diabetes and Other Risk Factors for Multi-drug Resistant

- 430 Tuberculosis in a Mexican Population with Pulmonary Tuberculosis: Case Control Study. Archives of  
431 medical research. 2015;46(2).
- 432 21. World Health Organization. WHO End TB Strategy. Geneva: Switzerland: World Health  
433 Organization; 2015.
- 434 22. Ley SD, Harino P, Vanuga K, Kamus R, Carter R, Coulter C, et al. Diversity of Mycobacterium  
435 tuberculosis and drug resistance in different provinces of Papua New Guinea. Biomed Central  
436 Microbiology. 2014;14(307).
- 437 23. Bainomugisa A, Lavu E, Hiashiri S, Majumdar S, Honjepari A, Moke R, et al. Multi-clonal  
438 evolution of multi-drug-resistant/extensively drug-resistant Mycobacterium tuberculosis in a high-  
439 prevalence setting of Papua New Guinea for over three decades. Microb Genom. 2018;4(2).
- 440 24. Bainomugisa A, Pandey S, Donnan E, Simpson G, Foster J, Lavu E, et al. Cross-border  
441 movement of a highly drug resistant Mycobacterium tuberculosis strain identified in the Torres  
442 Strait, Australia. Emerging Infectious Disease. 2019;25(3).
- 443 25. Foster J. Clinical management of tuberculosis in the Torres Strait / Papua New Guinea cross-  
444 border region between 2000 and 2020. Figshare; 2022.
- 445 26. Foster J, Mendez D, Marais B, Peniyamina D, McBryde ES. Time to commencement of  
446 effective treatment in patients with drug-resistant tuberculosis diagnosed in the Torres Strait /  
447 Papua New Guinea cross-border region. medRxiv; 2022.
- 448 27. Vincent SD. A clinician's perspective on providing TB services in the Torres Strait. Medical  
449 Journal of Australia. 2011;195(9):506-7.
- 450 28. Marais B, Sorrell T, Brittle W. Drug-resistant tuberculosis in PNG and Torres Strait islands.  
451 The Conversation. 2012.
- 452 29. Queensland Health. Tuberculosis (TB) Control Unit Brisbane, Queensland: Torres and Cape  
453 Hospital and Health Service; 2016 [Available from: [https://www.health.qld.gov.au/torres-  
454 cape/html/tuberculosis](https://www.health.qld.gov.au/torres-cape/html/tuberculosis)
- 455 30. Queensland Health. Tuberculosis in Queensland, 2016. Brisbane, Australia: State of  
456 Queensland (Queensland Health); 2017.
- 457 31. World Health Organization. WHO consolidated guidelines on tuberculosis. Module 5:  
458 Management of tuberculosis in children and adolescents. Geneva, Switzerland: WHO; 2022.
- 459 32. AUSLAB laboratory information system. Pathology Queensland; 2019.
- 460 33. de Mendonça EB, Schmaltz CA, Sant'Anna FM, Vizzoni AG, Mendes-de-Almeida DP, et al.  
461 Anemia in tuberculosis cases: A biomarker of severity? PLoS ONE. 2021;16(2).
- 462 34. Simpson G. Multidrug-resistant tuberculosis on Australia's northern border. Intern Med J.  
463 2011;41(11):759-61.
- 464 35. Falzon D, Mirzayev F, Wares F, Baena IG, Zignol M, Linh N, et al. Multidrug-resistant  
465 tuberculosis around the world: what progress has been made? Eur Respir J. 2015;45(1):150-60.
- 466 36. Torres and Cape Hospital and Health Service. Procedure: Management of Papua New Guinea  
467 Nationals accessing healthcare within the Australian Islands of the Torres Strait Protected Zone,  
468 presumed to have or diagnosed with tuberculosis. Cairns, Queensland: Torres and Cape Hospital and  
469 Health Service; 2017.
- 470 37. National Tuberculosis Advisory Committee. The Strategic Plan for Control of Tuberculosis in  
471 Australia, 2016–2020: Towards Disease Elimination. The National Tuberculosis Advisory Committee  
472 for the Communicable Diseases Network Australia Communicable Diseases Intelligence.  
473 2018;2019(43):1-19.
- 474 38. Javaid A, Khan MA, Khan MA, Mehreen S, Basit A, Khan RA, et al. Screening outcomes of  
475 household contacts of multidrug-resistant tuberculosis patients in Peshawar, Pakistan. Asian Pacific  
476 Journal of Tropical Medicine. 2016;9(9):909-12.

- 477 39. Khan MA, Mehreen S, Basit A, Khan RA, Jan F, Ullah I. Characteristics and treatment  
478 outcomes of patients with multi-drug resistant tuberculosis at a tertiary care hospital in Peshawar,  
479 Pakistan. *Saudi Medical Journal*. 2015;36(12):1463.
- 480 40. Torres and Cape Hospital and Health Service. TB education in PNG treaty villages. Cairns,  
481 Queensland; 2015.
- 482 41. World Health Organization. WHO treatment guidelines for drug-resistant tuberculosis.  
483 Geneva, Switzerland: WHO; 2016.
- 484 42. Alene KA, Viney K, McBryde ES, Tsegaye AT, Clements ACA. Treatment outcomes in patients  
485 with multidrug-resistant tuberculosis in north-west Ethiopia. *Tropical Medicine & International*  
486 *Health*. 2016;22(3):351-62.
- 487 43. Baker MA, Harries AD, Jeon CY, Hart JE, Kapur A, Lönnroth K, et al. The impact of diabetes on  
488 tuberculosis treatment outcomes: A systematic review. *BioMed Central Medicine*. 2011;9(81).
- 489 44. Viney K, O'Connor J, Wiegandt A. The epidemiology of tuberculosis in pacific island countries  
490 and territories: 2000-2007. *Asia Pac J Public Health*. 2011;23(1):86-99.
- 491 45. Bates M, Marais BJ, Zumla A. Tuberculosis Comorbidity with Communicable and  
492 Noncommunicable Diseases. *Perspectives in Medicine*. 2015;11(6).
- 493 46. Marais BJ, Lönnroth K, Lawn SD, Migliori GB, Mwaba P, Glaziou P, et al. Tuberculosis  
494 comorbidity with communicable and non-communicable diseases: integrating health services and  
495 control efforts. *Lancet Infect Dis*. 2013;13:436-48.
- 496 47. Hussein MM, Mooij JM, Roujouleh H. Tuberculosis and Chronic Renal Disease. *Seminars in*  
497 *Dialysis*. 2003;16(1):38-44.
- 498 48. Australian Department of Health. What we're doing about kidney disease Canberra,  
499 Australia: Australian Department of Health; 2020 [Available from:  
500 [https://www.health.gov.au/health-topics/chronic-conditions/what-were-doing-about-chronic-](https://www.health.gov.au/health-topics/chronic-conditions/what-were-doing-about-chronic-conditions/what-were-doing-about-kidney-disease)  
501 [conditions/what-were-doing-about-kidney-disease](https://www.health.gov.au/health-topics/chronic-conditions/what-were-doing-about-kidney-disease).
- 502 49. Australian Institute of Health and Welfare. Profiles of Aboriginal and Torres Strait Islander  
503 people with kidney disease. Canberra, Australia: Australian Institute of Health and Welfare; 2020.  
504 Report No.: 978-1-76054-712-7 Contract No.: Cat. no: IHW 229.
- 505 50. Lui SL, Tang S, Li FK, Choy BY, Chan TM, Lo WK, et al. Tuberculosis infection in Chinese  
506 patients undergoing continuous ambulatory peritoneal dialysis. *American Journal of Kidney Disease*.  
507 2001;38:1055-60.
- 508 51. Taskapan H, Utas C, Oymak FS, Gulmez I, Ozesmi M. The outcome of tuberculosis in patients  
509 on chronic hemodialysis. *Clinical Nephrology*. 2000;54:134-7.
- 510 52. Moore DA, Lightstone L, Javid B, Friedland JS. High rates of tuberculosis in end-stage renal  
511 failure: the impact of international migration. *Emerging Infectious Disease*. 2002;8:77-8.
- 512 53. Rarau P, Guo S, Baptista SN, Pulford J, McPake B, Oldenburg B. Prevalence of non-  
513 communicable diseases and their risk factors in Papua New Guinea: A systematic review. *SAGE Open*  
514 *Medicine*. 2020;8.
- 515 54. Chedid C, Kokhreizdec E, Tukvadze N, Banud S, Khaja M, Uddind M, et al. Association of  
516 baseline white blood cell counts with tuberculosis treatment outcome: a prospective multicentered  
517 cohort study. *International Journal of Infectious Diseases*. 2020;100:199-206.
- 518 55. Panteleev AV, Nikitina IY, Burmistrova IA, Kosmiadi GA, Radaeva TV, Amansahedov RB, et al.  
519 Severe Tuberculosis in Humans Correlates Best with Neutrophil Abundance and Lymphocyte  
520 Deficiency and Does Not Correlate with Antigen-Specific CD4 T-Cell Response. *Frontiers in*  
521 *Immunology*. 2017;21(8):963.
- 522 56. Kiran B, Cagatay T, Clark P, Kosar F, Cagatay P, Yurt S, et al. Can immune parameters be used  
523 as predictors to distinguish between pulmonary multidrug-resistant and drug-sensitive tuberculosis?  
524 *Archives of Medical Science*. 2010;6(1):77-82.
- 525 57. Mehta JB, Fields CL, Byrd Jr RP, Roy TM. Nutritional status and mortality in respiratory failure  
526 caused by tuberculosis. *Journal of the Tennessee Medical Association*. 1996;89(10):369-71.

- 527 58. Bendayan D, Hendler A, Polansky V, Weinberger M. Outcome of hospitalized MDR-TB  
528 patients: Israel 2000–2005. *European Journal of Clinical Microbiology and Infectious Diseases*.  
529 2011;30:375-9.
- 530 59. Nagu TJ, Spiegelman D, Hertzmark E, Aboud S, Makani J, Matee MI, et al. Anemia at the  
531 Initiation of Tuberculosis Therapy Is Associated with Delayed Sputum Conversion among Pulmonary  
532 Tuberculosis Patients in Dar-es-Salaam, Tanzania. *PLoS ONE*. 2014;9(3).

It is made available under a [CC-BY 4.0 International license](https://creativecommons.org/licenses/by/4.0/).

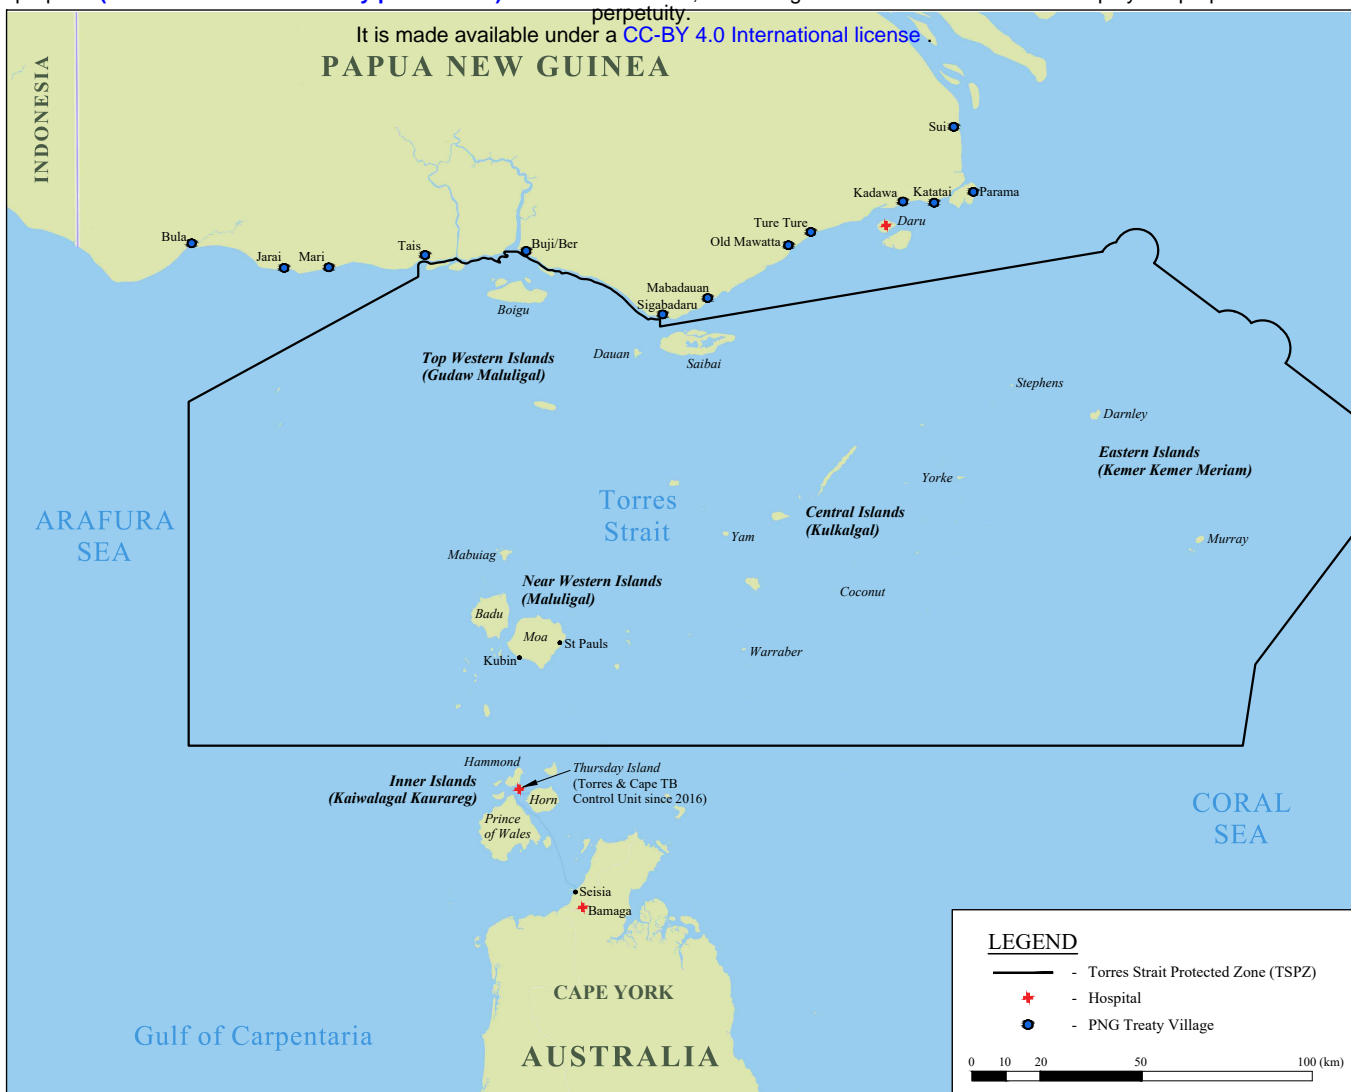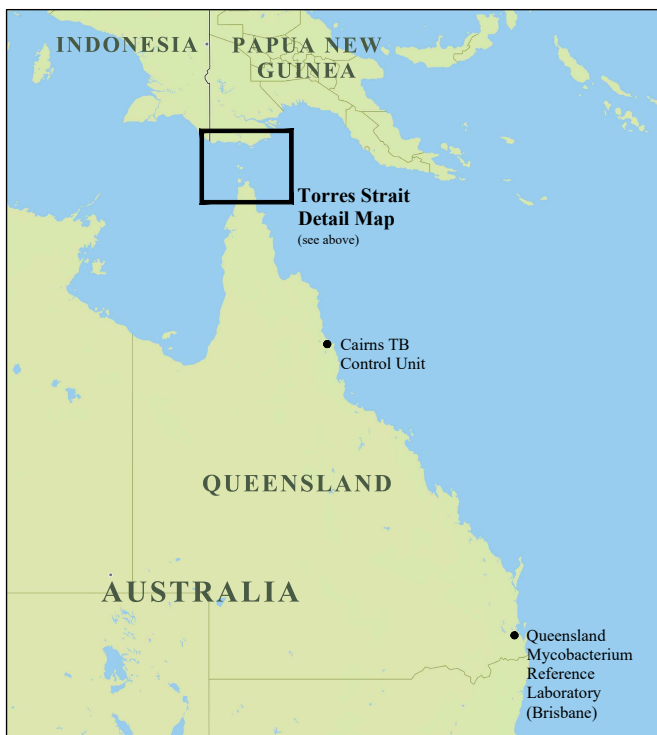

Source: https://www.medrxiv.org/content/10.1101/2022.03.22.22272751v2.full.pdf
